# Supplementary material
Source: publisher figshare collection journal article supplement (https://acs.figshare.com/ndownloader/files/4568110)
Supplement: Supplementary file 1 [file 4568110]

## Supplementary information for

# A one-pot green method for one-dimensional assembly of gold nanoparticles with a novel chitosan-ninhydrin bioconjugate at physiological temperature

Yi Wang,<sup>†</sup> Yuan Fang Li,<sup>†</sup> Cheng Zhi Huang,<sup>\*,†,‡</sup>

<sup>†</sup>College of Chemistry and Chemical Engineering, and <sup>‡</sup>College of Pharmaceutical Sciences, Education Ministry Key Laboratory on Luminescence and Real-Time Analysis, Southwest University, Chongqing 400715, PR China.

E-mail: [chengzhi@swu.edu.cn](mailto:chengzhi@swu.edu.cn)

## Figures

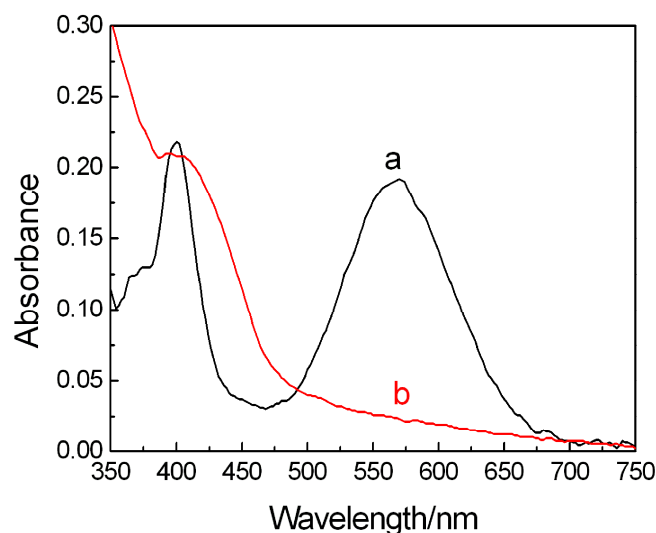

**Figure S1.** The progress of species removal in the dialysis process was monitored by UV-vis spectrophotometry. (a) The absorption spectra of solution before dialysis process, (b) The absorption spectra of solution after dialysis process.

\* Corresponding author. Tel.: +86-23-68254659; Fax: +86-23-68866796. E-mail address: [chengzhi@swu.edu.cn](mailto:chengzhi@swu.edu.cn) (C.Z. Huang).

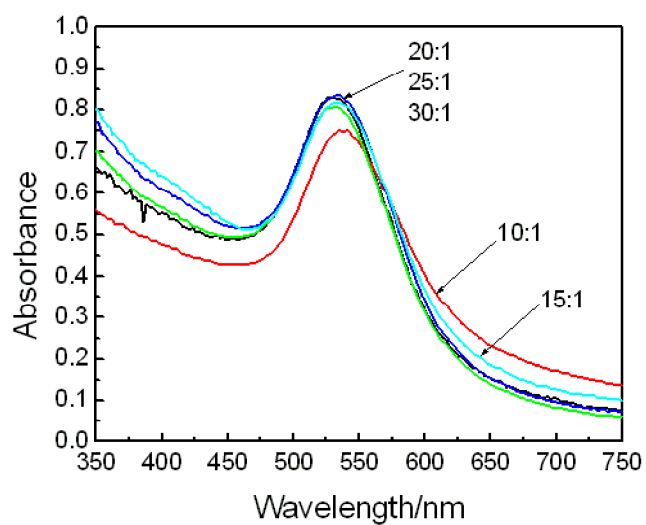

**Figure S2.** The UV-vis absorption spectra of samples prepared by various CHIT-NH repeat unit to  $\text{HAuCl}_4$  molar ratios.

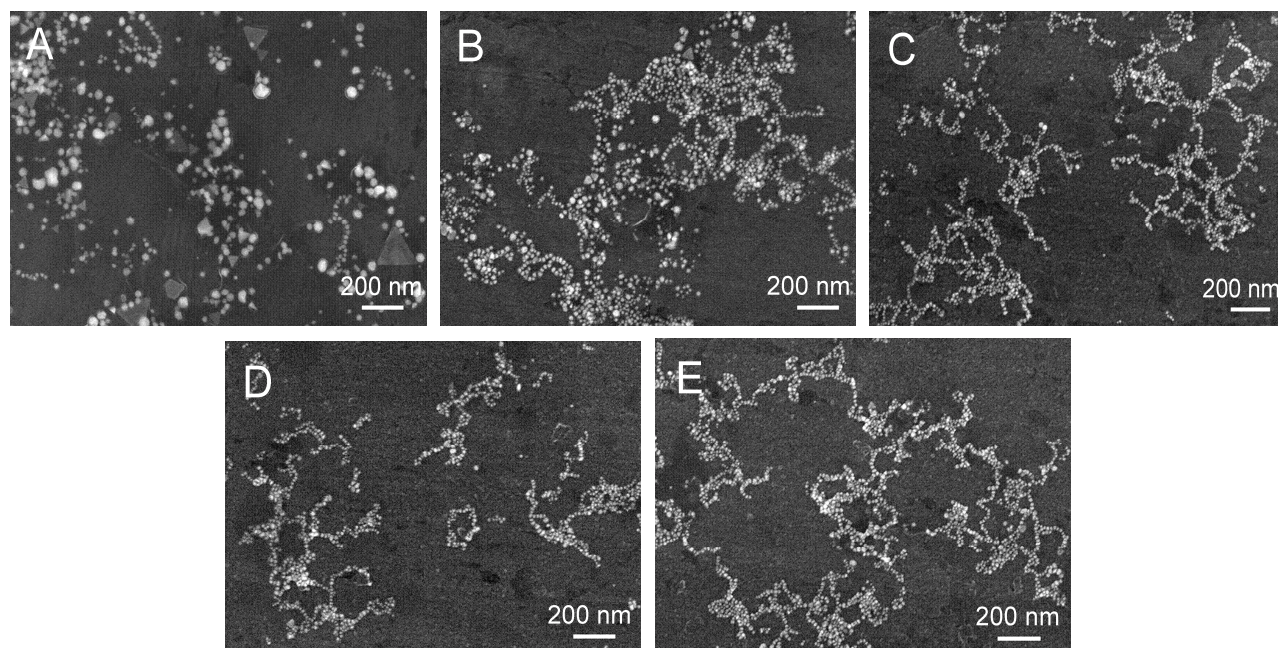

**Figure S3.** SEM micrographs of the CHIT-NH reacted with  $\text{HAuCl}_4$  at 37 °C at various molar ratios. The molar ratios of CHIT-NH repeat unit to  $\text{HAuCl}_4$  were (A) 10: 1, (B) 15: 1, (C) 20: 1, (D) 25: 1, and (E) 30: 1.

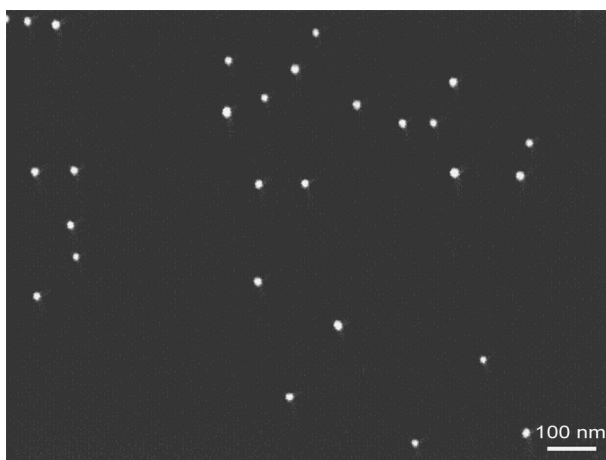

**Figure S4.** SEM micrograph of the gold NPs capped with citrate.

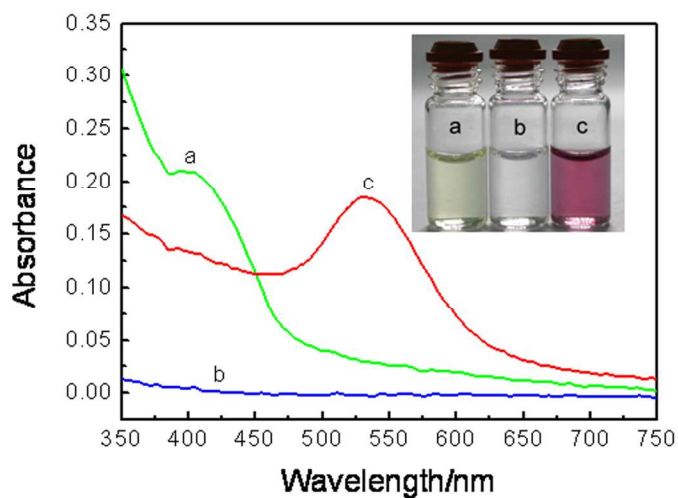

**Figure S5.** The contrast of UV-vis absorption spectra between CHIT-NH conjugate and chitosan reacted with  $\text{HAuCl}_4$  at  $37^\circ\text{C}$ , respectively. (a) CHIT-NH, (b) chitosan reacted with  $\text{HAuCl}_4$  (20:1) for 24 h under magnetic stirring, (c) CHIT-NH conjugate reacted with  $\text{HAuCl}_4$  (20:1) for 24 h under magnetic stirring. The insert picture is the photography of solution corresponding to the absorption spectra.
